# Supplementary material for: The Influence of Ink Formulation and Preparation on the Performance of Proton-Exchange Membrane Fuel Cell
Source: MDPI journal article supplement (doi:10.3390/en16227519), 2023-11-10
Supplement: s1 [file s1]

Archive with 1 entries (1 files):
- energies-2691156-supplementary.pdf
