# Supplementary material for: The Influence of Ink Formulation and Preparation on the Performance of Proton-Exchange Membrane Fuel Cell
Source: MDPI journal article supplement (doi:10.3390/en16227519), 2023-11-10
Supplement: s1 [file s1 › energies-2691156-supplementary.pdf]

## Supplementary Information

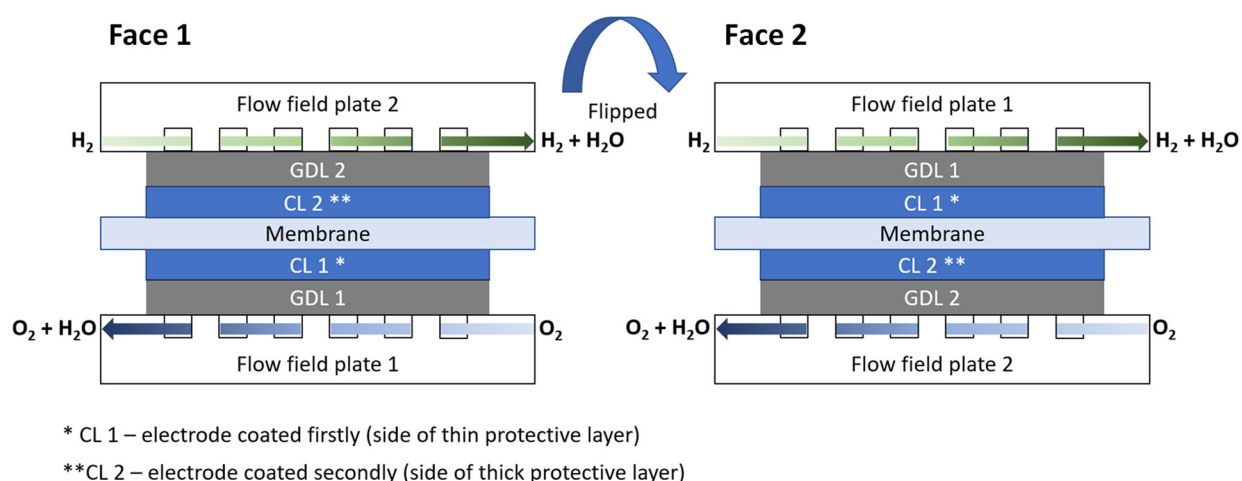

**Figure S1.** Face 1 and Face 2 configurations, where the anode side is at the top and the cathode side at the bottom of each configuration.

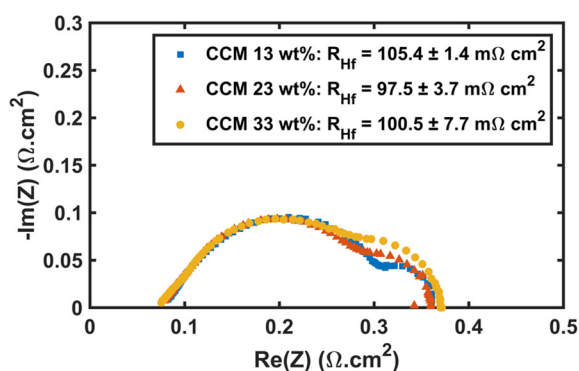

**Figure S2.** In – situ impedance spectroscopy spectra measured at a current of 3.6 A.
